# Supplementary material for: Synergistic effect of coordinating interface and promoter for enhancing ammonia synthesis activity of Ru@N–C catalyst
Source: Royal Society of Chemistry journal article supplement (doi:10.1039/d3ra04824a), 2023-01-01
Supplement: d3ra04824a1.pdf [file d3ra04824a1.pdf]

## Supplementary Information

### **Synergistic effect of coordinating interface and promoter for enhancing ammonia synthesis activity of Ru@N-C catalyst**

Dongwei Wang,<sup>ab</sup> Zhanwei Ma,<sup>\*a</sup> Farong Gou,<sup>a</sup> and Bin Hu<sup>\*a</sup>

- a.** State Key Laboratory for Oxo Synthesis and Selective Oxidation, Lanzhou Institute of Chemical Physics, Chinese Academy of Sciences, Lanzhou 730000, China
- b.** University of Chinese Academy of Sciences, Beijing 100049, China

## 1. Ru/AC(450) catalyst:

The activated carbon particles treated with nitric acid were placed in an ark and roasted in a tube furnace under argon atmosphere at 450 °C for one hour of a heating rate of 5 °C/min. Then  $\text{Ru}_3(\text{CO})_{12}$  was dissolved in tetrahydrofuran solution, roasted activated carbon was added, impregnated and stirred at room temperature for 24 hours, and then the sample was placed on a rotary evaporator to remove the solvent, and the obtained sample was dried in a drying oven at 60 °C. The dried sample is also roasted in the tube furnace under argon gas for one hour, the temperature is 450 °C, and the heating rate is 5 °C /min. After the roasting is completed, the sample is removed by the furnace after natural cooling to room temperature, which is donated as Ru/AC(450). The load capacity of Ru is 3%.

## 2. The analysis of ammonia synthesis rate

**A).** Chemical titration: The rate of ammonia synthesis was determined with Congo red as an indicator when the amount of  $\text{H}_2\text{SO}_4$  was known. The concentration of  $\text{H}_2\text{SO}_4$  used is 0.05 mol/L. Determination is to take 25  $\mu\text{L}$  of  $\text{H}_2\text{SO}_4$  and add 50  $\mu\text{L}$  of Congo red indicator to the sample tube, and then add 2 mL of deionized water, the sample tube is connected to the fixed bed reactor, record the time of indicator color change, and convert to the export ammonia rate.

**B).** Nessler's reagent spectrophotometry: The outlet ammonia is absorbed by 0.05 mol/L  $\text{H}_2\text{SO}_4$  solution, and the  $\text{NH}_4^+$  generated in the solution reacts with the Nessler's reagent to form a yellow brown complex. The absorbance of the complex is directly proportional to the content of  $\text{NH}_4^+$ . The absorbance of the complex is measured at 420 nm wavelength, and the  $\text{NH}_4^+$  content in the solution can be calculated according to the absorbance. The outlet ammonia rate is obtained.

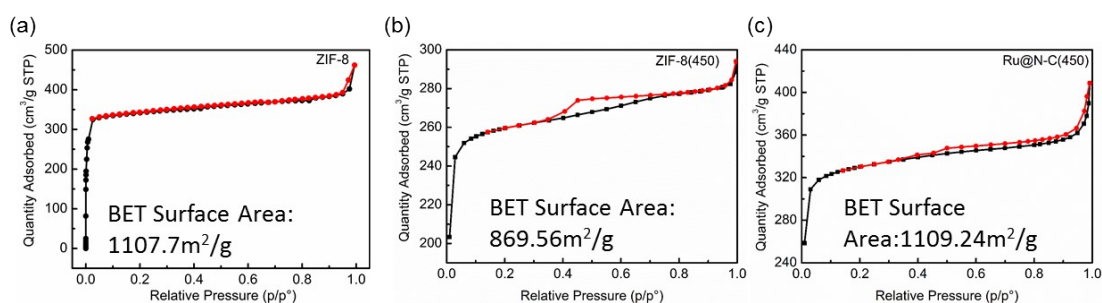

**Figure S1.** Nitrogen adsorption–desorption isotherms of ZIF-8, ZIF-8(450) and Ru@N-C(450) samples.

**Table S1.** Textural parameters of calcined ZIF-8(450) and Ru@N-C(450) samples.

| Sample      | $S$ (m <sup>2</sup> /g) | Pore Volume (cm <sup>3</sup> /g) | Pore Size (nm) |
|-------------|-------------------------|----------------------------------|----------------|
| ZIF-8       | 1107.7                  | 2.163                            | 0.63           |
| ZIF-8(450)  | 869.56                  | 0.45                             | 2.05           |
| Ru@N-C(450) | 1109.24                 | 0.60                             | 2.17           |

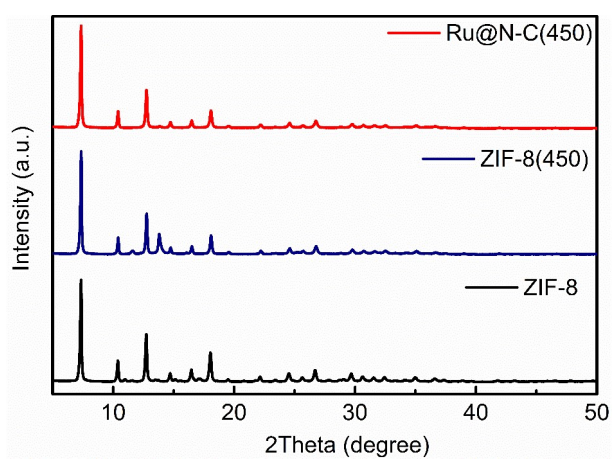

**Figure S2.** XRD patterns of ZIF-8, ZIF-8(450), and Ru@N-C(450).

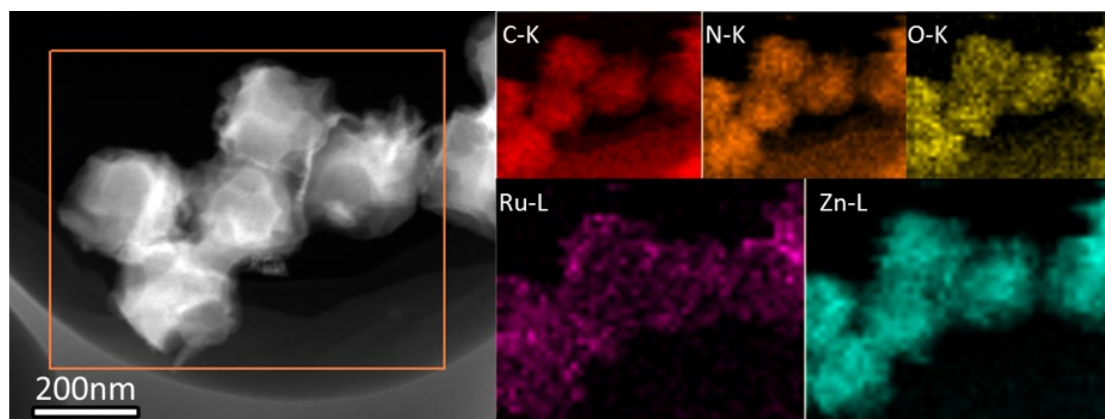

**Figure S3.** The elemental mapping of Ru@N-C(450) catalyst before reaction.

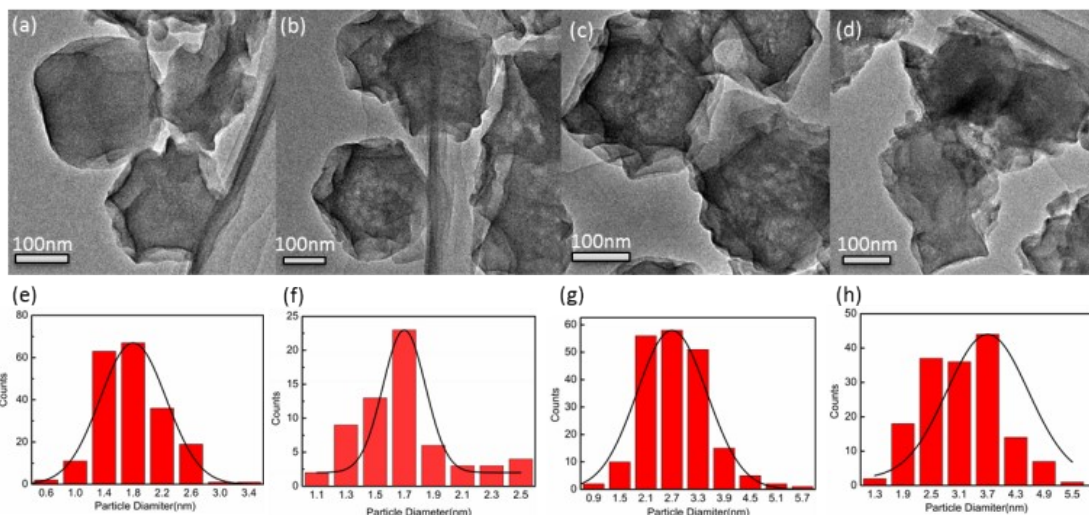

**Figure S4.** TEM images of (a) Ru@N-C(400), (b) Ru@N-C(450), (c) Ru@N-C(500), (d) Ru@N-C(900) and their corresponding Ru particle distribution histograms(e-h).

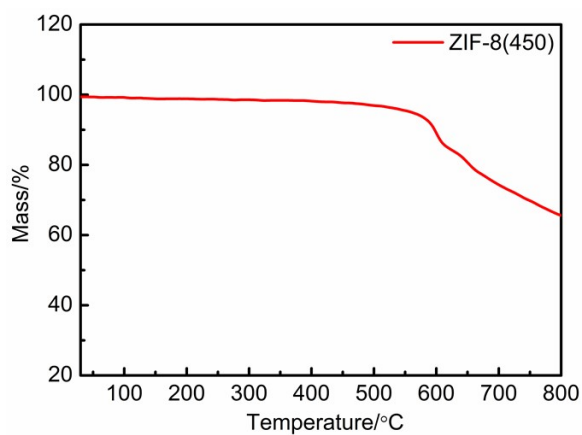

**Figure S5.** TG analysis plot of ZIF-8(450) support.

#### ZIF-8(450) catalyst:

The prepared ZIF-8 was placed in an ark and calcined in a tubular furnace at 450°C for one hour of a heating rate of 5°C /min. After the calcination, the sample was naturally cool to room temperature and then taken out and recorded as ZIF-8(450).

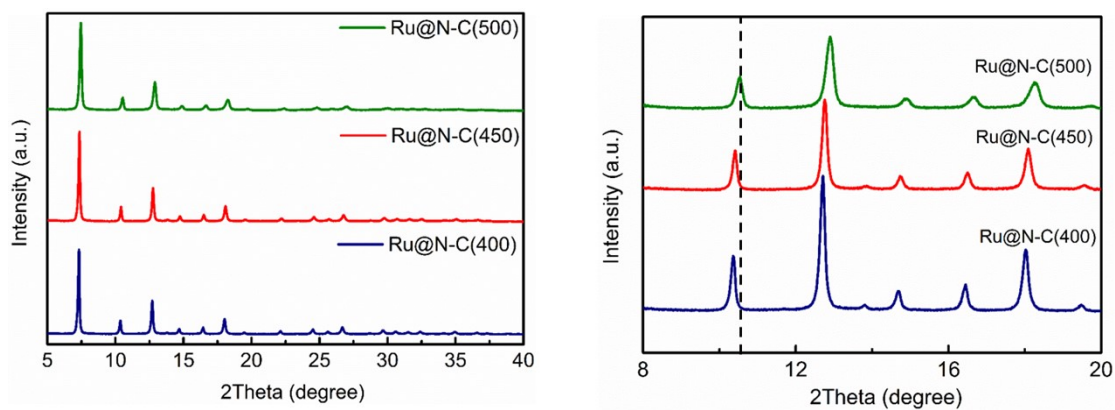

**Figure S6.** XRD patterns of Ru@N-C(400), Ru@N-C(450), and Ru@N-C(500).

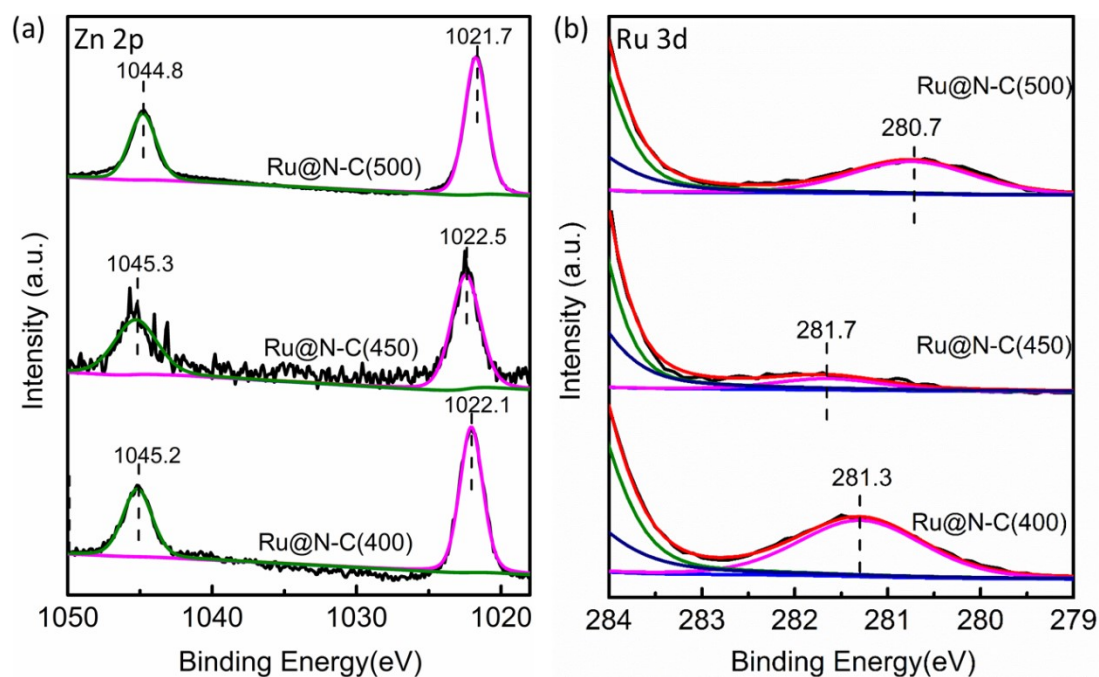

**Figure S7.** The XPS spectra of (a) Zn 2p and (b) Ru 3d in Ru@N-C(500), Ru@N-C(450) and Ru@N-C(400) catalysts.

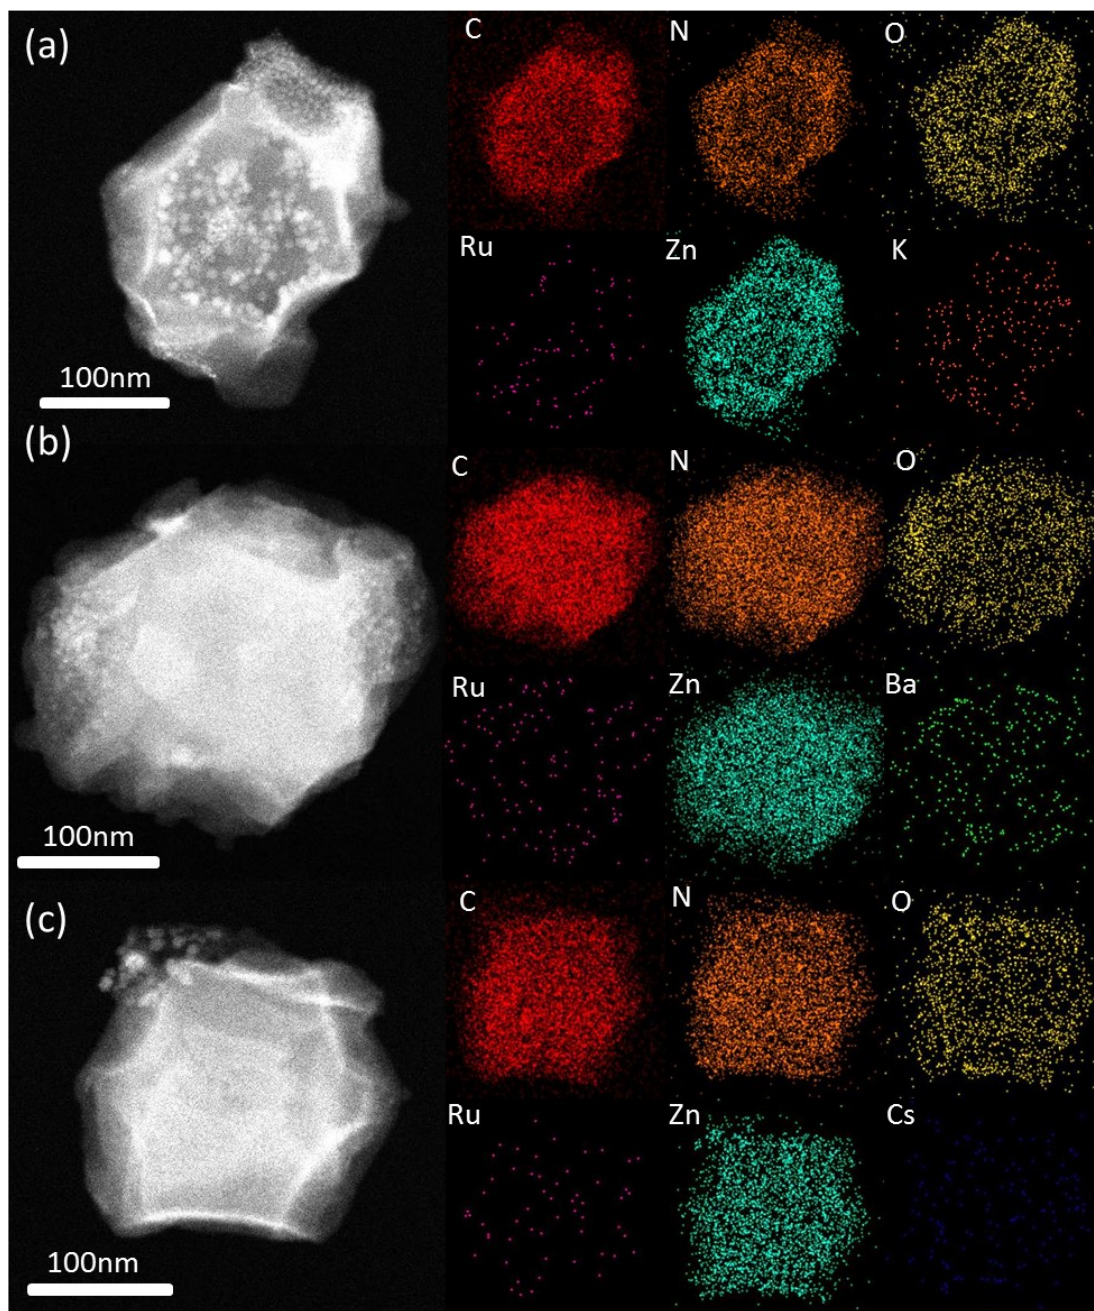

**Figure S8** The elemental mapping of (a) 2K-Ru@N-C(450), (b) 2Ba-Ru@N-C(450), (c) 2Cs-Ru@N-C(450)

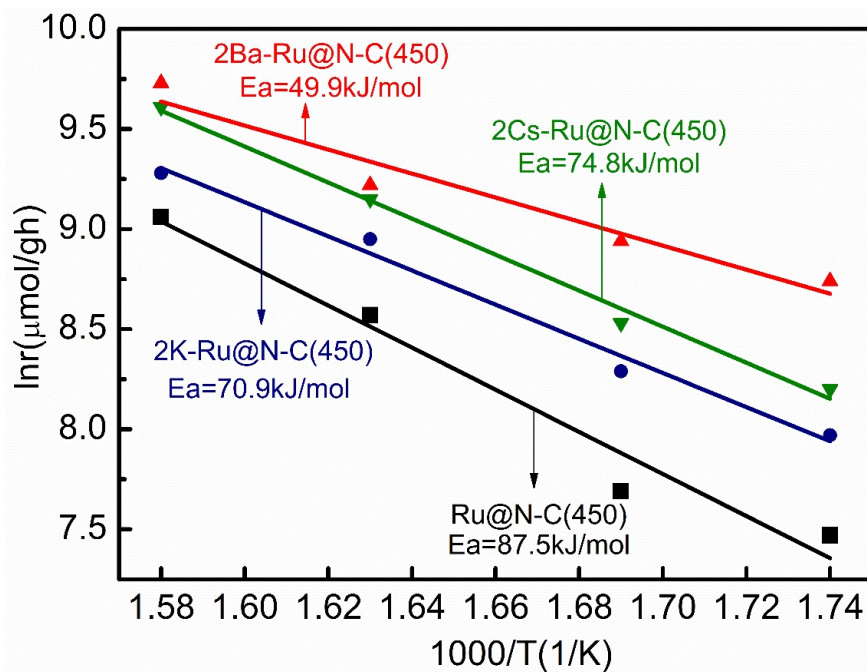

**Figure S9.** Arrhenius plots of Ru@N-C catalysts in the temperature range of 573–633 K.

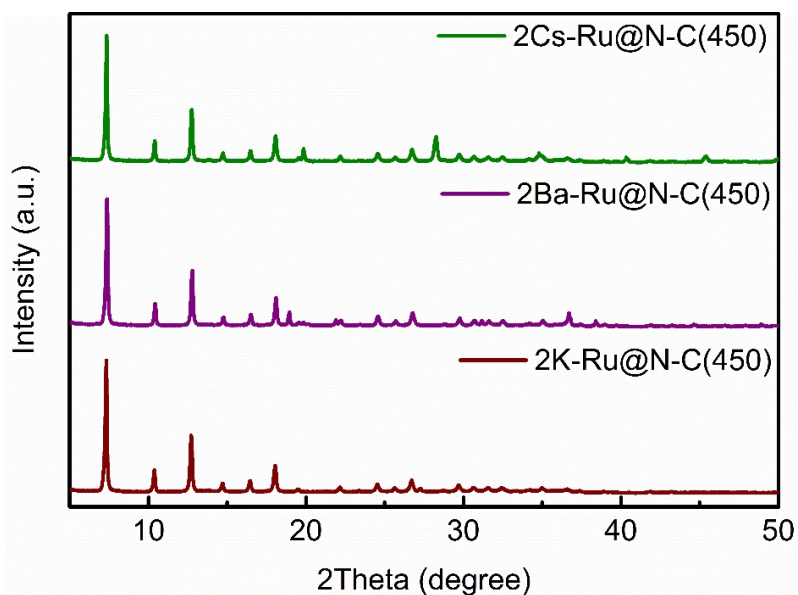

**Figure S10.** XRD patterns of 2Cs-Ru@N-C(450), 2Ba-Ru@N-C(450), and 2K-Ru@N-C(450).

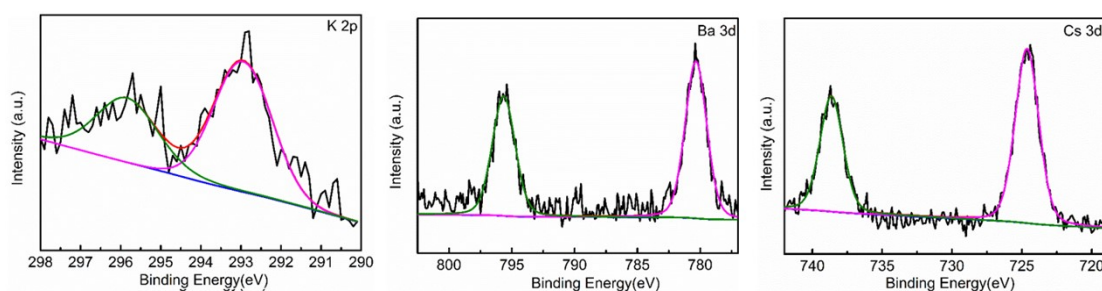

**Figure S11.** XPS spectra of K 2p, Ba 3d, and Cs 3d of 2K-Ru@N-C(450), 2Ba-Ru@N-C(450), and 2Cs-Ru@N-C(450) catalysts.

It can be noted that the Cs 3d<sup>5/2</sup> binding energy at 724.3 eV is much lower than that of Cs<sub>2</sub>O (725.2 eV) in Fig. S4. According to the previous reports [1,2], Ru nanoparticle can facilitate the decomposition of CsNO<sub>3</sub>, KNO<sub>3</sub>, and Ba(NO<sub>3</sub>)<sub>2</sub> at around 120 °C and partial Cs reduction has been observed by XAS. Thus, the Cs 3d<sup>5/2</sup> binding energy at 724.3 eV can be attributed to the partially reduced cesium (CsO<sub>x</sub>). The Ba 3d<sup>5/2</sup> binding energy at 780.4 eV is ascribed to the formation of BaO, which is in accordance with the previous report [3].

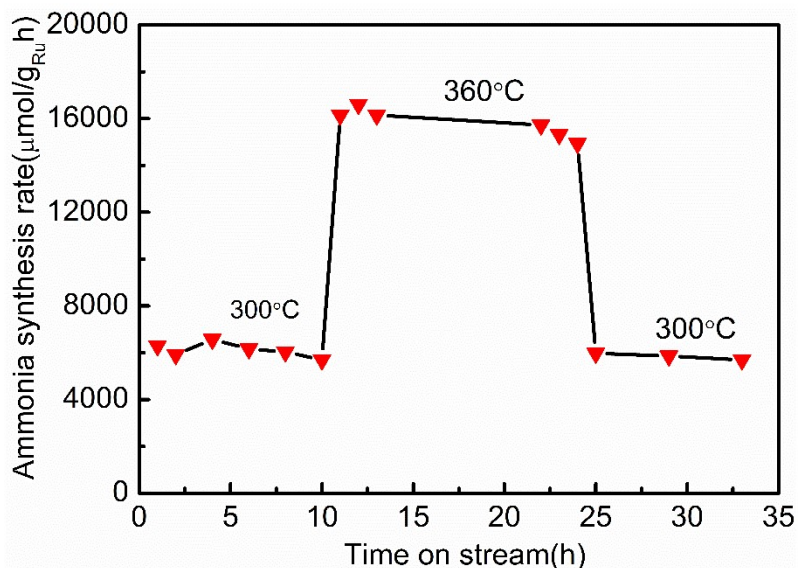

**Figure S12.** Time dependence of the catalytic activities of the 2Ba-Ru@N-C(450) catalysts. Reaction conditions: 0.5 g, N<sub>2</sub> : H<sub>2</sub> = 1 : 3, 60 mL min<sup>-1</sup>, and 1 MPa.



**Table S2.** Rate of ammonia synthesis over Ru catalysts supported on various supports.

| Catalysts                                         | Ru (wt %) | Pressure (MPa) | Temperature (°C) | Rate ( $\mu\text{mol}\cdot\text{h}^{-1}\cdot\text{g}^{-1}_{\text{Ru}}$ ) | Rate ( $\mu\text{mol}\cdot\text{h}^{-1}\cdot\text{g}^{-1}_{\text{cat}}$ ) | Ref.             |
|---------------------------------------------------|-----------|----------------|------------------|--------------------------------------------------------------------------|---------------------------------------------------------------------------|------------------|
| Ru@N-C(450)                                       | 3.0       | 1              | 360              | 8604.2                                                                   | 258.1                                                                     | <i>This work</i> |
| 2Ba-Ru@N-C(450)                                   | 3.0       | 1              | 360              | 16817.3                                                                  | 504.5                                                                     | <i>This work</i> |
| Co(0.3 %)/BaTiO <sub>3</sub>                      | -         | 5              | 400              | -                                                                        | 14                                                                        | 4                |
| Fe(0.4 %)/BaTiO <sub>3</sub>                      | -         | 5              | 400              | -                                                                        | 200                                                                       | 4                |
| Co(0.3 %)/BaTiO <sub>2.35</sub> H <sub>0.65</sub> | -         | 5              | 400              | -                                                                        | 550                                                                       | 4                |
| Ru/Eu <sub>2</sub> O <sub>3</sub> -m              | 3         | 1              | 400              | 15366                                                                    | 461                                                                       | 5                |
| Ba-Ru/MgO                                         | 8         | 1              | 315              | 6037.5                                                                   | 483                                                                       | 6                |
| Ru/spherical CeO <sub>2</sub>                     | 4         | 1              | 400              | 13225                                                                    | 529                                                                       | 7                |
| Ru Cs/MgO                                         | 5         | 1              | 300              | 11060                                                                    | 553                                                                       | 8                |
| Mn <sub>4</sub> N-NaH                             | -         | 1              | 300              | -                                                                        | ~50                                                                       | 9                |
| Mn <sub>4</sub> N-CaH <sub>2</sub>                | -         | 1              | 300              | -                                                                        | ~400                                                                      | 9                |
| Mn <sub>4</sub> N-KH                              | -         | 1              | 300              | -                                                                        | ~500                                                                      | 9                |
| Cs-MgO-Ru/MS                                      | 8.7       | 0.4            | 500              | 1095.4                                                                   | 92.2                                                                      | 10               |
| MgO-Ru/MS                                         | 8.4       | 0.4            | 500              | 184.5                                                                    | 15.6                                                                      | 10               |
| Cs-Ru/MS                                          | 5.0       | 0.4            | 500              | 304                                                                      | 15.2                                                                      | 10               |
| Ru/r-Al <sub>2</sub> O <sub>3</sub>               | 1.9       | 0.1            | 400              | 421.06                                                                   | 8                                                                         | 11               |
| Ru/CaO                                            | 1.5       | 0.1            | 350              | 800                                                                      | 12                                                                        | 12               |
| Ba Ru/AC                                          | 1.0       | 0.1            | 350              | 1400                                                                     | 14                                                                        | 12               |
| Ni+ Ni <sub>2</sub> Mo <sub>3</sub> N             | -         | 0.1            | 400              | -                                                                        | 15                                                                        | 13               |
| Cs-Ru/r-Al <sub>2</sub> O <sub>3</sub>            | 2.0       | 0.1            | 315              | 1450                                                                     | 29                                                                        | 14               |
| Ru/CaNH                                           | 1.8       | 0.1            | 300              | 2944.4                                                                   | 53                                                                        | 15               |

|                                                       |     |     |     |         |     |    |
|-------------------------------------------------------|-----|-----|-----|---------|-----|----|
| Ru/C <sub>12</sub> A <sub>7</sub> :O <sub>2</sub>     | 1.2 | 0.1 | 350 | 4916.7  | 59  | 12 |
| CaRuSi                                                | -   | 0.1 | 400 | -       | 60  | 16 |
| Ba-Ru/AC                                              | 1.0 | 0.1 | 400 | 14800   | 148 | 12 |
| Ru/CaO                                                | 1.5 | 0.1 | 400 | 10533.3 | 158 | 12 |
| CoNiMo <sub>3</sub> N                                 | -   | 0.1 | 400 | -       | 160 | 13 |
| Ru/BaH <sub>2</sub>                                   | 10  | 0.1 | 340 | 2000    | 200 | 17 |
| Ni <sub>1.7</sub> Cu <sub>0.2</sub> Mo <sub>3</sub> N | -   | 0.1 | 500 | -       | 231 | 18 |
| Ru/CaTiO <sub>3</sub>                                 | 2   | 0.1 | 400 | 13400   | 268 | 19 |
| Ni <sub>2</sub> Mo <sub>3</sub> N                     | -   | 0.1 | 500 | -       | 272 | 18 |
| Ba-Ru/MgO                                             | 8   | 0.1 | 315 | 3662.5  | 293 | 6  |
| Ru/CaNH                                               | 1.8 | 0.1 | 340 | 17111.1 | 308 | 15 |
| Fe-K <sub>2</sub> O-Al <sub>2</sub> O <sub>3</sub>    | -   | 0.1 | 400 | -       | 330 | 16 |
| Ni <sub>1.1</sub> Fe <sub>0.9</sub> Mo <sub>3</sub> N | -   | 0.1 | 500 | -       | 354 | 19 |
| Ni <sub>2</sub> Mo <sub>3</sub> N                     | -   | 0.1 | 400 | -       | 383 | 13 |
| Co <sub>3</sub> Mo <sub>3</sub> C                     | -   | 0.1 | 500 | -       | 461 | 21 |
| Co <sub>3</sub> Mo <sub>3</sub> N                     | -   | 0.1 | 500 | -       | 489 | 21 |
| Ru/C <sub>12</sub> A <sub>7</sub> :O <sub>2</sub>     | 1.2 | 0.1 | 400 | 45500   | 546 | 12 |
| Ru/r-Al <sub>2</sub> O <sub>3</sub>                   | 6.3 | 0.1 | 450 | 14650.8 | 923 | 5  |

#### Referance:

1. I. Rossetti, L. Sordelli, P. Ghigna, S. Pin, M. Scavini and L. Forni, EXAFS/XANES Evidence of in Situ Cesium Reduction in CsRu/C Catalysts for Ammonia Synthesis. *Inorg. Chem.*, 2011, **50**, 3757-3765.
2. I. Rossetti, F. Mangiarini and L. Forni, Promoters state and catalyst activation during ammonia synthesis over Ru/C. *Appl. Catal. A*, 2007, **323**, 219-225.
3. E. Truskiewicz, W. Raróg-Pilecka, K. Schmidt-Szałowski, S. Jodzis, E. Wilczkowska, D. Łomot, Z. Kaszkur, Z. Karpiński and Z. Kowalczyk, Barium-promoted Ru/carbon catalyst for ammonia synthesis: State of the system when operating. *J. Catal.*, 2009, **265**, 181-190.
4. Y. Tang, Y. Kobayashi, N. Masuda, Y. Uchida, H. Okamoto, T. Kageyama, S. Hosokawa, F. Loyer, K. Mitsuahara, K. Yamanaka, et al, Metal-Dependent Support Effects of Oxyhydride-Supported Ru, Fe, Co Catalysts for Ammonia Synthesis. *Met. Adv. Energy. Mater.*, 2018, **8**, 1801772.

5. A. Miyazaki, I. Balint, K. I. Aika and Y. Nakano, Preparation of High Activity Catalyst for Ammonia Synthesis by Supporting Well-Defined Ru Nanoparticles on  $\gamma$ -Al<sub>2</sub>O<sub>3</sub>. *Chemistry Letters*, 2003, **12**, 1332-1333.
6. Z. You, K. Inazu, K. I. Aika and T. Baba, Electronic and structural promotion of barium hexaaluminate as a ruthenium catalyst support for ammonia synthesis. *Journal of Catalysis*, 2007, **251**, 321-331.
7. Z. Ma, S. Zhao, X. Pei, X. Xiong and B. Hu, New insights into the support morphology-dependent ammonia synthesis activity of Ru/CeO<sub>2</sub> catalysts. *Catal. Sci. Technol.*, 2017, **7**, 191-199.
8. K. Kishida, M. Kitano, M. Sasase, P. V. Sushko, H. Abe, Y. Niwa, K. Ogasawara, T. Yokoyama and H. Hosono, Air-Stable Calcium Cyanamide-Supported Ruthenium Catalyst for Ammonia Synthesis and Decomposition. *ACS Appl. Energy Mater.*, 2020, **3**, 6573-6582.
9. F. Chang, Y. Guan, X. Chang, J. Guo, P. Wang, W. Gao, G. Wu, J. Zheng, X. Li and P. Chen, Alkali and Alkaline Earth Hydrides-Driven N<sub>2</sub> Activation and Transformation over Mn Nitride Catalyst. *J. Am. Chem. Soc.*, 2018, **140**, 14799-14806.
10. J. Ding, L. Wang, P. Wu, A. Li, W. Li, C. Stampfl, X. Liao, B. S. Haynes, X. Han and J. Huang, Confined Ru Nanocatalysts on Surface to Enhance Ammonia Synthesis: An In situ ETEM Study. *ChemCatChem.*, 2020, **13**, 534-538.
11. S. Murata and K. Aika, Preparation and characterization of chlorine-free ruthenium catalysts and the promoter effect in ammonia synthesis.: 1. An alumina-supported ruthenium catalyst. *Journal of Catalysis*, 1992, **136**, 110-117.
12. M. Kitano, Y. Inoue, Y. Yamazaki, F. Hayashi, S. Kanbara, S. Matsuishi, T. Yokoyama, S. W. Kim, M. Hara and H. Hosono, Ammonia synthesis using a stable electride as an electron donor and reversible hydrogen store. *Nat. Chem.*, 2012, **4**, 934-940.
13. N. Bion, F. Can, J. Cook, JSJ. Hargreaves, A. L. Hector, W. Levason, A. R. McFarlane, M. Richard and K. Sardar, The role of preparation route upon the ambient pressure ammonia synthesis activity of Ni<sub>2</sub>Mo<sub>3</sub>N. *Appl. Catal. A*. 2015, **504**, 44-50.
14. S. Murata and K. Aika, Preparation and characterization of chlorine-free ruthenium catalysts and the promoter effect in ammonia synthesis.: 1. An alumina-supported ruthenium catalyst. *Journal of Catalysis*, 1992, **136**, 118-125.
15. M. Kitano, Y. Inoue, H. Ishikawa, K. Yamagata, T. Nakao, T. Tada, S. Matsuishi, T. Yokoyama, M. Hara and H. Hosono, Essential role of hydride ion in ruthenium-based ammonia synthesis catalysts. *Chem. Sci.*, 2016, **7**, 4036-4043.
16. Y. Gong, J. Wu, M. Kitano, J. Wang, T. N. Ye, J. Li, Y. Kobayashi, K. Kishida, H. Abe, Y. Niwa, et al., Ternary intermetallic LaCoSi as a catalyst for N<sub>2</sub> activation. *Nat. Cat.*, 2018, **1**, 178-185.
17. J. Wu, J. Li, Y. Gong, M. Kitano, T. Inoshita and H. Hosono, Intermetallic Electride Catalyst as a Platform for Ammonia Synthesis. *Angew. Chem. Int. Ed.*, 2019, **58**, 825-829.
18. M. Hattori, T. Mori, T. Arai, Y. Inoue, M. Sasase, T. Tada, M. Kitano, T. Yokoyama, M. Hara and H. Hosono, Enhanced Catalytic Ammonia Synthesis with Transformed BaO. *ACS. Catal.*, 2018, **8**, 10977-10984.
19. S. Al Sobhi, JSJ. Hargreaves, A. L. Hector and S. Laassiri, Citrate-gel preparation and ammonia synthesis activity of compounds in the quaternary (Ni,M)<sub>2</sub>Mo<sub>3</sub>N (M = Cu or Fe) systems. *Dalton Trans*, 2019, **48**, 16786-16792.
20. Y. Horiuchi, G. Kamei, M. Saito and M. Matsuoka, Development of Ruthenium-loaded Alkaline-earth Titanates as Catalysts for Ammonia Synthesis. *Chem. Lett.*, 2013, **42**, 1282-1284.
21. I. AlShibane, A. Daisley, JSJ. Hargreaves, A. L. Hector, S. Laassiri, J. L. Rico and R. I. Smith, The Role of

Composition for Cobalt Molybdenum Carbide in Ammonia Synthesis. ACS. Sustainable. Chem. Eng., 2017, 5, 9214-9222.
